# Supplementary material for: Evolution of binding preferences among whole-genome duplicated transcription factors
Source: eLife. 2022 Apr 11;11:e73225. doi: 10.7554/eLife.73225 (PMC9000951; doi:10.7554/eLife.73225)
Supplement: Figure 1—source data 1. [file elife-73225-fig1-data1.xls]

## Sheet: Sheet1
Strain A; Strain B	# Rpts A; # Rpts B	mean pbs Corr (Pearson's R)	std pbs Corr	- log10(mean p-Value pbs)	mean 7mer Corr (Pearson's R)	std 7mer Corr	- log10(mean p-Value 7mers)
Mig2;Mig3	1;1	0.959243	0	>300	0.965185	0	>300
Msn2;Msn4	1;1	0.954633	0	>300	0.959888	0	>300
Nrg1;Nrg2	1;1	0.950579	0	>300	0.943276	0	>300
Stp1;Stp2	2;2	0.936329	0.00459809	>300	0.905731	0.0313606	>300			`
Met31;Met32	2;2	0.897051	0.0152127	>300	0.813071	0.00969345	>300
Tda9;Rsf2	2;2	0.884248	0.0177796	>300	0.900707	0.0114209	>300
Stp3;Stp4	2;3	0.663176	0.0402271	>300	0.708467	0.03383	>300
Rgm1;Usv1	2;3	0.535724	0.0275083	>300	0.577475	0.0235833	>300
Ace2;Swi5	2;2	0.553605	0.0109804	>300	0.599928	0.00433649	>300
Gis1;Rph1	2;3	0.286431	0.0386936	71.3385	0.576725	0.0241249	>300
Sut1;Sut2	2;2	0.872526	0.0262717	>300	0.868994	0.0150821	>300
Hal9;Tbs1	2;1	0.782279	0.0193764	>300	0.774448	0.0194802	>300
Oaf1;Pip2	3;3	0.749281	0.0114531	>300	0.747512	0.0113677	>300
Ecm22;Upc2	2;2	0.697773	0.0158552	>300	0.660558	0.0268458	>300
Pdr1;Pdr3	2;2	0.623216	0.0182898	>300	0.662647	0.0193332	>300
Pdr8;Yrr1	2;2	0.46032	0.0200138	258.036	0.571527	0.0158047	>300
Aca1;Cst6	1;1	0.894888	0	>300	0.859689	0	>300
Yap4;Yap6	2;2	0.665266	0.00994806	>300	0.589442	0.00506433	>300
Yap1;Yap2	1;1	0.316956	0	126.096	0.327304	0	203.088
Yap5;Yap7	2;2	0.0558106	0.0019046	4.35267	0.0544731	0.00291913	5.84212
Spt23;Mga2	3;2	0.934242	0.0123063	>300	0.874564	0.0205036	>300
Phd1;Sok2	2;2	0.890338	0.00837892	>300	0.872345	0.00943503	>300
Dot6;Tod6	4;2	0.829829	0.0246625	>300	0.817279	0.0402205	>300
Yhp1;Yox1	2;2	0.820633	0.0133988	>300	0.819826	0.0212581	>300
Gzf3;Dal80	2;4	0.786759	0.0390469	>300	0.767938	0.0329148	>300
Skn7;Hms2	2;3	0.764245	0.00516966	>300	0.774801	0.0142657	>300
Cup9;Tos8	2;2	0.611822	0.0172935	>300	0.554485	0.0136686	>300
Smp1;Rlm1	4;4	0.488091	0.0267542	255.159	0.567549	0.0341747	>300
Fkh1;Fkh2	2;2	0.359358	0.0171654	148.426	0.507624	0.00639955	>300
Vhr1;Vhr2	3;3	0.304175	0.0269433	87.9064	0.329552	0.0298656	157.907
