# Supplementary material for: Evolution of binding preferences among whole-genome duplicated transcription factors
Source: eLife. 2022 Apr 11;11:e73225. doi: 10.7554/eLife.73225 (PMC9000951; doi:10.7554/eLife.73225)
Supplement: Figure 4—source data 1. [file elife-73225-fig4-data1.xls]

## Sheet: Sheet1
Strain A	Strain B	# Rpts A; # Rpts B	mean pbs Corr (Pearson's R)	std pbs Corr	- log10(mean p-Value pbs)	mean 7mer Corr	std 7mer Corr	- log10(mean p-Value 7mers)
Dot6	Dot6_Tod6_DBD	4;2	0.960104	0.00759027	>300	0.954136	0.00810385	>300
Tod6	Dot6_Tod6_DBD	2;2	0.825567	0.0181146	>300	0.830917	0.0306273	>300
Ecm22	Ecm22_Upc2_DBD	2;2	0.686486	0.00214296	>300	0.64163	0.00720175	>300
Upc2	Ecm22_Upc2_DBD	2;2	0.574529	0.0384517	>300	0.555952	0.0275351	>300
Fkh1	Fkh1_Fkh2_DBD	2;4	0.916564	0.0202586	>300	0.924344	0.0136274	>300
Fkh2	Fkh1_Fkh2_DBD	2;4	0.490854	0.0508836	230.105	0.595272	0.0195302	>300
Fkh1	Fkh2_Fkh1_DBD	2;3	0.419176	0.00441225	222.059	0.486565	0.0262247	>300
Fkh2	Fkh2_Fkh1_DBD	2;3	0.937529	0.0123594	>300	0.914441	0.0201533	>300
Gis1	Gis1_Rph1_DBD	2;4	0.948327	0.00966652	>300	0.930218	0.0159404	>300
Rph1	Gis1_Rph1_DBD	3;4	0.242294	0.0464478	37.1099	0.545132	0.0517951	>300
Pdr8	Pdr8_Yrr1_DBD	2;3	0.581302	0.0443964	>300	0.701436	0.0338049	>300
Yrr1	Pdr8_Yrr1_DBD	2;3	0.548857	0.0731834	283.22	0.486169	0.0887811	>300
Rlm1	Rlm1_Smp1_DBD	4;3	0.482273	0.0211254	269.083	0.536217	0.0495284	>300
Smp1	Rlm1_Smp1_DBD	4;3	0.29007	0.0306832	72.2133	0.38239	0.0571715	188.28
Gis1	Rph1_Gis1_DBD	2;4	0.436868	0.113335	114.825	0.657327	0.0792885	>300
Rph1	Rph1_Gis1_DBD	3;4	0.884395	0.0566191	>300	0.936567	0.0262103	>300
Ace2	Swi5_Ace2_DBD	2;3	0.602045	0.0201748	>300	0.61832	0.0612207	>300
Swi5	Swi5_Ace2_DBD	2;3	0.961553	0.00601814	>300	0.922266	0.0121881	>300
Dot6	Tod6_Dot6_DBD	4;2	0.850095	0.0297864	>300	0.826082	0.0394711	>300
Tod6	Tod6_Dot6_DBD	2;2	0.933101	0.011137	>300	0.920941	0.0267038	>300
Cup9	Tos8_Cup9_DBD	2;4	0.616891	0.0327416	>300	0.600497	0.034406	>300
Tos8	Tos8_Cup9_DBD	2;4	0.894771	0.030114	>300	0.863721	0.0491554	>300
Ecm22	Upc2_Ecm22_DBD	2;4	0.627038	0.0276833	>300	0.543649	0.0608559	>300
Upc2	Upc2_Ecm22_DBD	2;4	0.458674	0.0328195	217.158	0.415078	0.045212	261.526
Vhr1	Vhr1_Vhr2_DBD	3;3	0.892151	0.00827673	>300	0.854826	0.0204375	>300
Vhr2	Vhr1_Vhr2_DBD	3;3	0.420609	0.0258998	185.754	0.49758	0.0431486	>300
Vhr1	Vhr2_Vhr1_DBD	3;3	0.339194	0.0285999	111.638	0.381942	0.0490718	175.92
Vhr2	Vhr2_Vhr1_DBD	3;3	0.897148	0.0168748	>300	0.904398	0.0209577	>300
Yhp1	Yhp1_Yox1_DBD	2;2	0.763563	0.0818686	>300	0.800447	0.0369652	>300
Yox1	Yhp1_Yox1_DBD	2;2	0.747929	0.0849048	>300	0.731619	0.0444467	>300
Yhp1	Yox1_Yhp1_DBD	2;3	0.828305	0.0239559	>300	0.786265	0.0314077	>300
Yox1	Yox1_Yhp1_DBD	2;3	0.943474	0.0156879	>300	0.916526	0.0145207	>300
Pdr8	Yrr1_Pdr8_DBD	2;4	0.449592	0.0345027	211.907	0.478144	0.0986991	272.798
Yrr1	Yrr1_Pdr8_DBD	2;4	0.823072	0.021227	>300	0.793507	0.0518879	>300
