# Supplementary material for: Evolution of binding preferences among whole-genome duplicated transcription factors
Source: eLife. 2022 Apr 11;11:e73225. doi: 10.7554/eLife.73225 (PMC9000951; doi:10.7554/eLife.73225)
Supplement: Figure 7—source data 1. [file elife-73225-fig7-data1.xls]

## Sheet: Sheet1
Strain A	Strain B	# Rpts A; # Rpts B	mean pbs Corr (Pearson's R)	std pbs Corr	- log10(mean p-Value pbs)	mean 7mer Corr (Pearson's R)	std 7mer Corr	- log10(mean p-Value 7mers)
Tod6	Dot6_lactis	2;4	0.858332	0.0109782	>300	0.858332	0.0109782	>300
Dot6	Dot6_lactis	4;4	0.839924	0.0386928	>300	0.839924	0.0386928	>300
Fkh1	Fkh2_lactis	2;2	0.492052	0.0111895	313.683	0.492052	0.0111895	313.683
Fkh2	Fkh2_lactis	2;2	0.902548	0.0139629	>300	0.902548	0.0139629	>300
Dal80	Gzf3_lactis	4;4	0.562376	0.0291182	>300	0.562376	0.0291182	>300
Gzf3	Gzf3_lactis	2;4	0.585764	0.0248499	>300	0.585764	0.0248499	>300
Met31	Met32_lactis	2;2	0.703365	0.0108288	>300	0.703365	0.0108288	>300
Met32	Met32_lactis	2;2	0.801313	0.00411121	>300	0.801313	0.00411121	>300
Nrg1	Nrg2_lactis	1;3	0.814759	0.0292676	>300	0.728575	0.0171243	>300
Nrg2	Nrg2_lactis	1;3	0.815622	0.0230393	>300	0.707448	0.0145408	>300
Pip2	Oaf1_lactis	3;2	0.875546	0.00870487	>300	0.875546	0.00870487	>300
Oaf1	Oaf1_lactis	3;2	0.695818	0.00779147	>300	0.695818	0.00779147	>300
Smp1	Rlm1_lactis	4;2	0.621558	0.0306105	>300	0.621558	0.0306105	>300
Rlm1	Rlm1_lactis	4;2	0.849628	0.0111252	>300	0.849628	0.0111252	>300
Gis1	Rph1_lactis	2;2	0.710212	0.00562505	>300	0.710212	0.00562505	>300
Rph1	Rph1_lactis	3;2	0.722541	0.0355782	>300	0.722541	0.0355782	>300
Hms2	Skn7_lactis	3;2	0.399648	0.00583494	198.25	0.399648	0.00583494	198.25
Skn7	Skn7_lactis	2;2	0.674865	0.00856337	>300	0.674865	0.00856337	>300
Sut2	Sut1_lactis	2;3	0.560814	0.0131011	>300	0.560814	0.0131011	>300
Sut1	Sut1_lactis	2;3	0.564835	0.0235862	>300	0.564835	0.0235862	>300
Ace2	Swi5_lactis	2;3	0.775545	0.00630961	>300	0.775545	0.00630961	>300
Swi5	Swi5_lactis	2;3	0.556345	0.0123461	>300	0.556345	0.0123461	>300
Hal9	Tbs1_lactis	2;3	0.763392	0.00882032	>300	0.763392	0.00882032	>300
Tbs1	Tbs1_lactis	2;3	0.677756	0.00980257	>300	0.677756	0.00980257	>300
Rsf2	Tda9_lactis	2;2	0.898522	0.00420019	>300	0.898522	0.00420019	>300
Tda9	Tda9_lactis	2;2	0.881709	0.00560642	>300	0.881709	0.00560642	>300
Ecm22	Upc2_lactis	2;2	0.774201	0.014024	>300	0.774201	0.014024	>300
Upc2	Upc2_lactis	2;2	0.87009	0.0157755	>300	0.87009	0.0157755	>300
Vhr2	Vhr1_lactis	3;2	0.372609	0.0225591	146.133	0.372609	0.0225591	146.133
Vhr1	Vhr1_lactis	3;2	0.859638	0.0223222	>300	0.859638	0.0223222	>300
Yap2	Yap1_lactis	1;4	0.592185	0.0137578	>300	0.578335	0.0144716	>300
Yap1	Yap1_lactis	1;4	0.802261	0.0126923	>300	0.674233	0.0346367	>300
Yap5	Yap7_lactis	2;3	0.417419	0.0207779	211.281	0.417419	0.0207779	211.281
Yap7	Yap7_lactis	2;3	0.463937	0.00658529	280.216	0.463937	0.00658529	280.216
Yox1	Yhp1_lactis	2;4	0.790755	0.0252619	>300	0.790755	0.0252619	>300
Yhp1	Yhp1_lactis	2;4	0.628298	0.0263656	>300	0.628298	0.0263656	>300
